# Supplementary material for: Deep Learning for Delineation of the Spinal Canal in Whole-Body Diffusion-Weighted Imaging: Normalising Inter- and Intra-Patient Intensity Signal in Multi-Centre Datasets
Source: MDPI journal article supplement (doi:10.3390/bioengineering11020130), 2024-01-29
Supplement: s1 [file s1]

**Table S1.** Training parameters of the spinal canal segmentation model.

| Parameters                                         | 2D U-Net model for spinal canal segmentation                                                                                        |
|----------------------------------------------------|-------------------------------------------------------------------------------------------------------------------------------------|
| Input                                              | S0 image + ADC map                                                                                                                  |
| Convolutional blocks for encoder and decoder paths | 4                                                                                                                                   |
| Kernel filters in the first convolutional block    | 32                                                                                                                                  |
| Encoder convolutional block                        | Two convolutional layers with kernel size 3x3 and stride 1 followed by batch normalization and ReLU                                 |
| Max pooling                                        | For memory efficiency by reducing the spatial resolution of the feature maps                                                        |
| Dropout rate                                       | 0.2                                                                                                                                 |
| Bottleneck layer depth                             | 512                                                                                                                                 |
| Decoder convolutional block                        | 2D transposed convolution layers with kernel size 3x3 and stride 2 followed by dropout and two convolutional layers                 |
| Final layer                                        | Sigmoid                                                                                                                             |
| Loss                                               | Focal Tversky loss with<br>$\alpha = 0.3$<br>$\beta = 0.7$<br>$\gamma = 1.1$                                                        |
| Optimizer                                          | Adam                                                                                                                                |
| Dynamic learning rate                              | Start from $10^{-3}$ and decrease by half if the loss does not improve for 10 consecutive epochs until a minimum value of $10^{-5}$ |
| Number of epochs                                   | 150                                                                                                                                 |
| Batch size                                         | 8 axial images (256x256)                                                                                                            |
